# Supplementary material for: Lithium Chloride Suppresses Colorectal Cancer Cell Survival and Proliferation through ROS/GSK-3β/NF-κB Signaling Pathway
Source: Hindawi journal article supplement (doi:10.1155/2014/241864), 2014-01-01
Supplement: f1 [file 241864.f1.pdf]

**Supplemental Table**

Table 1 The sequences of primers for real time RT-PCR

| Gene     | Primer Sequence (Forward and Reverse) |
|----------|---------------------------------------|
| GAPDH    | 5'- CCACTCCTCCACCTTTGAC -3'           |
|          | 5'- ACCCTGTTGCTGTAGCCA -3'            |
| NF-κB    | 5'- GCAGCACTACTTCTTGACCACC -3'        |
|          | 5'- TCTGCTCCTGAGCATTGACGTC -3'        |
| Bcl-2    | 5'- ATCGCCCTGTGGATGACTGAGT -3'        |
|          | 5'- GCCAGGAGAAATCAAACAGAGGC -3'       |
| survivin | 5'- GCCCAGTGTTTCTTCTGCTT -3'          |
|          | 5'- CCGGACGAATGCTTTTTATG -3'          |
